1 **Transposable Element Evolution in the Allotetraploid *Capsella bursa-pastoris***

2 J. Arvid Ågren<sup>1,2</sup>, Hui-Run Huang<sup>3</sup>, Stephen I. Wright<sup>1</sup>

3

4 <sup>1</sup> Department of Ecology and Evolutionary Biology, University of Toronto

5 <sup>2</sup> Present address: Department of Molecular Biology and Genetics, Cornell University

6 <sup>3</sup> Key Laboratory of Plant Resources Conservation and Sustainable Utilization, South

7 China Botanical Garden, the Chinese Academy of Sciences

8

9 Key words: C-value; genome size; mating system; polyploidy

10 Running head: Transposable element evolution in tetraploid *Capsella*

11 Word count: 2759

12 Abstract word count: 236

13 Number of figures: 5

14 Number of tables: 1

15

16

17

18

19

20

21

22

23

1 **Abstract**

2 *Premise of the study*

3 Shifts in ploidy affect the evolutionary dynamics of genomes in a myriad of ways.  
4 Population genetic theory predicts that transposable element (TE) proliferation may  
5 follow because the genome wide efficacy of selection should be reduced and the increase  
6 in gene copies may mask the deleterious effects of TE insertions. Moreover, in  
7 allopolyploids TEs may further accumulate because of hybrid breakdown of TE  
8 silencing. However, to date the evidence of TE proliferation following an increase in  
9 ploidy is mixed, and the relative importance of relaxed selection vs. silencing breakdown  
10 remains unclear.

11 *Methods*

12 We used high-coverage whole genome sequence data to evaluate the abundance, genomic  
13 distribution, and population frequencies of TEs in the self-fertilizing recent allotetraploid  
14 *Capsella bursa-pastoris* (Brassicaceae). We then compared the *C. bursa-pastoris* TE  
15 profile with that of its two parental diploid species, outcrossing *C. grandiflora* and self-  
16 fertilizing *C. orientalis*.

17 *Key results*

18 We found no evidence that *C. bursa-pastoris* has experienced a large genome wide  
19 proliferation of TEs relative to its parental species. However, when centromeric regions  
20 are excluded, we find evidence of significantly higher abundance of retrotransposons in  
21 *C. bursa-pastoris* along the gene-rich chromosome arms, compared to *C. grandiflora* and  
22 *C. orientalis*.

23 *Conclusions*

- 1 The lack of a genome-wide effect of allopolyploidy on TE abundance, combined with the
- 2 increases TE abundance in gene-rich regions suggest that relaxed selection rather than
- 3 hybrid breakdown of host silencing explains the TE accumulation in *C. bursa-pastoris*.

## 1 **Introduction**

2 A central goal of population and comparative genomics research is to understand what  
3 factors drive the evolution of genome size and structure (Gregory, 2005; Lynch, 2007;  
4 Alföldi and Lindblad-Toh, 2013; Koenig and Weigel, 2015). Coupled with decades of  
5 information on genome size from flow cytometry across diverse lineages, the growing  
6 wealth of whole genome sequence data has revealed how extensive and rapidly genome  
7 size and structure can evolve, even among close relatives (Ungerer et al., 2006; Hawkins  
8 et al., 2009; Wright and Ågren, 2011; Tenaillon et al., 2011; Leitch and Leitch, 2013;  
9 Ågren and Wright 2015; Ågren et al., 2015). Yet our ability to explain this variation  
10 remains in its infancy.

11 Whole genome duplication via polyploidization has long been considered to be a  
12 major contributor to genome evolution (Adams and Wendel, 2005; Soltis and Soltis,  
13 2012; Hollister 2015; Soltis et al. 2015). Most obviously, polyploidization will cause a  
14 direct increase in the total amount of DNA per cell. This initial doubling of genome size  
15 has often been followed by a process of diploidization, leading to a pattern of DNA loss  
16 over time (Leitch and Bennet, 2004; Lysak et al., 2009; Renny-Byfield et al., 2013; Vu et  
17 al., 2015). Furthermore, although the direct role of recent polyploidy on genome size  
18 evolution can be investigated and controlled for, most plant species have experienced a  
19 history of whole genome duplication in their evolutionary history (Vision et al. 2000;  
20 Jaillon et al., 2007; Jiao et al., 2011; Vanneste et al., 2014; Li et al. 2015). A lack of  
21 complete information on this history can therefore make it difficult to fully investigate the  
22 importance of whole genome duplication events on the evolution of genome size and  
23 structure.

1           In addition to the direct effect of ploidy on genome size, transposable element  
2 (TE) proliferation may follow whole-genome duplications due to the masking of  
3 deleterious insertions and a reduction of the efficacy of selection across the genome  
4 caused by genome redundancy (recently reviewed in Parisod and Senerchia, 2012; Tayalé  
5 and Parisod, 2013). Furthermore, host-mediated silencing of TEs may be disrupted in  
6 allopolyploids (where an increase in ploidy is due to interspecific hybridization; Madlung  
7 et al., 2002; 2005; Kraitshtein et al., 2010; Yaakov et al., 2011). This combination of  
8 relaxed selection and a breakdown of silencing mechanisms could potentially drive  
9 dramatic evolution of genome structure following whole genome duplication. In  
10 particular, gene-dense euchromatic regions with very low TE content may experience  
11 major accumulation of TEs in genic regions. Such a mechanism may explain, for  
12 example, the dramatic transposable element expansion in the maize genome following  
13 whole genome duplication (Schnable et al., 2009; Baucom et al., 2009; Diez et al., 2014).

14           On the other hand, genome downsizing in polyploids may lead to a net loss of  
15 transposable elements during the process of diploidization (Parisod et al., 2010). The  
16 empirical evidence of changes in TE abundance following an increase in ploidy is  
17 equivocal. An increase in TE copy number was reported in *Nicotiana tabacum* (Petit et  
18 al., 2007; 2010; but see Renny-Byfield et al., 2011), whereas *Orobancha gracilis* appears  
19 to have experienced TE loss (Kraitshtein et al., 2010). Thus, overall, the factors driving  
20 proliferation vs. loss of transposable elements in polyploids remain poorly understood,  
21 and the relative importance of relaxed selection vs. silencing breakdown in TE  
22 accumulation is not clear.

1           Here, we use high-coverage whole genome sequence data to evaluate the  
2 abundance, genomic distribution, and population frequencies of TEs in the self-fertilizing  
3 allotetraploid *Capsella bursa-pastoris*. *Capsella bursa-pastoris* is a recently derived  
4 allotetraploid, with population genomic evidence for genome-wide reduction in the  
5 strength of selection on point mutations due to both gene redundancy and its selfing  
6 mating system (Douglas et al. 2015), making it an interesting model to examine the early  
7 fate of transposable elements following allopolyploidization. We look for evidence of TE  
8 proliferation beyond what would be expected from additivity of its two parental diploid  
9 species and use patterns of genomic distribution of TE insertions to distinguish the  
10 relative importance of relaxed selection vs. silencing breakdown. We discuss our results  
11 in light of the literature on the association between polyploidization, mating system, and  
12 TE abundance across plant species.

13

## 14 **Material and Methods**

### 15 *Study system*

16 The genus *Capsella* of the Brassicaceae family consists of four species with varying  
17 mating system, ploidy, and geographical distribution (Hurka et al. 2012; Figure 1).  
18 Selfing is thought to have evolved multiple times from an ancient progenitor of the  
19 diploid ( $2n = 2x = 16$ ) *Capsella grandiflora*, a self-incompatible species restricted to  
20 Albania and northwestern Greece. Most recently, *Capsella rubella* diverged from *C.*  
21 *grandiflora* within the last 100,000 years (Fuxe et al. 2009; Guo et al. 2009; Slotte et al.  
22 2013; Brandvain et al. 2013). *Capsella orientalis* is thought to have evolved selfing prior  
23 to *C. rubella*, also from a *C. grandiflora*-like ancestor. *C. orientalis* and *C. grandiflora*

1 have been inferred to have diverged approximately 930,000 years ago, providing the  
2 potential for a longer time period of mating system divergence (Douglas et al. 2015).  
3 Whereas *C. rubella* has expanded to a larger Mediterranean distribution, *C. orientalis* is  
4 now found in an area spanning Eastern Europe to Central Asia (Hurka et al. 2012). The  
5 origin of the world-wide distributed *Capsella bursa-pastoris* long remained elusive, but  
6 was recently determined to be an allotetraploid ( $2n = 4x = 32$ ) following a hybridization  
7 event between *C. grandiflora* and *C. orientalis* within the last 100,000-300,000 years  
8 (Douglas et al. 2015). Consistent with this hybrid origin, a principal component analysis  
9 of the types of TEs found in *C. bursa-pastoris* puts it as an intermediate between *C.*  
10 *grandiflora* and *C. orientalis* and of all shared insertions found in two of the three  
11 species, the majority are between *C. bursa-pastoris* and either *C. grandiflora* or *C.*  
12 *orientalis*, with very few shared between *C. grandiflora* and *C. orientalis* to the exclusion  
13 of *C. bursa-pastoris* (Douglas et al. 2015). In this study, we expand the TE analysis of *C.*  
14 *bursa-pastoris*, to test for an accumulation of TEs following allopolyploid origins.

15

#### 16 *Identification and quantification of transposable elements*

17 To compare the abundance, genomic locations, and population frequencies of TEs in the  
18 three species we combined the TE datasets generated by Ågren et al. (2014) and Douglas  
19 et al. (2015). These studies applied the PoPoolationTE pipeline of Kofler et al. (2012) on  
20 108-bp paired-end Illumina reads on 7 *C. bursa-pastoris*, as well as 8 *C. grandiflora* and  
21 10 *C. orientalis* individuals sampled across their respective geographical distributions,  
22 which provides the most comprehensive picture of TE evolution in each species. Ågren et  
23 al. (2014) also analysed TE distributions in *C. rubella*, but for this study we focus on the

1 two direct progenitor species of *C. bursa-pastoris*, *C. grandiflora* and *C. orientalis*. We  
2 used the *C. rubella* reference genome (Slotte et al. 2013) and the TE database generated  
3 as part of the same study, which consisted of sequence data from seven Brassicaceae  
4 species, including *Capsella rubella*, *Brassica rapa*, *Arabis alpina*, *Arabidopsis thaliana*  
5 (accessions Col-0, Ler, Kro-0, Bur-0, and C24 from the 1001 *Arabidopsis* genomes  
6 project), *Arabidopsis lyrata*, *Eutrema halophila*, and *Schrenkiella parvulum*. Since the  
7 PoPoolation TE approach is designed for pooled population data, the original output is an  
8 estimate of the population frequency of each TE insertion. We adjusted the pipeline to  
9 use population frequencies to infer insertions as homo- or heterozygous. We ignored as  
10 spurious insertions with an estimated frequency of  $<0.2$  and considered insertions with a  
11 frequency of  $>0.8$  as homozygous. Intermediate frequency insertions were treated as  
12 heterozygous. Note that for our highly selfing tetraploid species, insertions identified as  
13 ‘heterozygous’ when mapping to the diploid *C. rubella* reference genome are in fact  
14 likely to be homozygous in one of the two homeologous genomes, and so for *C. bursa-*  
15 *pastoris*, intermediate frequency insertions were treated as homozygous at one of the two  
16 homeologues, while fixed insertions were treated as present in both homeologues. To  
17 avoid falsely inferring independent insertions due to the uncertainty in the method in the  
18 precise genomic position, we treated insertions as the same if the distance of the inferred  
19 location of two or more insertions across individuals was  $< 200$  bp and the inferred TE  
20 family was identical. In previous work, we performed extensive tests to ensure that this  
21 approach could generally distinguish homo- and heterozygous insertions (Ågren et al.  
22 2014). We used this approach to determine the abundance, genomic locations, and  
23 population frequencies of TEs in the three species.



1

## 2 **Results**

3 We quantified the abundance of four major categories of TEs: DNA, Helitrons, long  
4 terminal repeat (LTR) retrotransposons and non-LTR retrotransposons. The three species  
5 differ in their mean number of TEs (Kruskal-Wallis chi-squared  $\chi^2 = 21.342$ ,  $df = 2$ ,  
6  $p < 0.00001$ ), but genome-wide all species show similar relative abundance across  
7 elements, with LTR elements making up the bulk of the insertions (Figure 2).

8 To test whether *C. bursa-pastoris* has experienced an accumulation or loss of TEs  
9 following its origin, we calculated the expected diploid TE copy number from a *C.*  
10 *orientalis*  $\times$  *C. grandiflora* hybrid and compared this number to the observed *C. bursa-*  
11 *pastoris* abundance. We randomly paired up *C. orientalis* and *C. grandiflora*  
12 chromosomes and calculated the average TE copy number of such a cross (where  
13 heterozygous insertions were given a copy number of 0.5). We performed 1,000  
14 replicates of *in silico* crosses, sampling with replacement, based on the present-day TE  
15 abundances. We then compared the expected copy number to the observed abundance in  
16 *C. bursa-pastoris* and found that *C. bursa-pastoris* harbours slightly but significantly  
17 more insertions genome-wide than what would be expected under strict additivity (Figure  
18 2; Wilcoxon rank sum test,  $p = 0.01297$ ). Thus, overall we do not observe evidence for a  
19 major reduction in host silencing driving high rates of transposition.

20 Since TE insertions near genes will likely disrupt gene function, population  
21 genetic theory predicts that selection will rapidly remove such insertions (Dolgin and  
22 Charlesworth 2008). Following a whole-genome doubling event, a tetraploid like *C.*  
23 *bursa-pastoris* will carry twice as many gene copies as its diploid progenitors and the

1 fitness cost of an insertion should therefore be less. As a consequence, tetraploids may be  
2 expected to accumulate more TEs near genes than diploids. To test this prediction, we  
3 first excluded the centromeric regions of the genome, following the annotation of Slotte  
4 et al. (2013), and considered TE abundance in the gene-rich chromosome arms only.  
5 Restricting our attention to these regions, we find that *C. bursa-pastoris* has a  
6 considerably higher TE abundance than expected from additivity (Figure 3; Wilcoxon  
7 rank sum test,  $p = 0.0005828$ ), particularly for retrotransposons. Second, we used the  
8 gene annotation from the reference genome of *C. rubella* (Slotte et al. 2013) to calculate  
9 the distance to the closest gene for all TE insertions, in all three species. Again, just like  
10 the overall abundance, we are interested in whether *C. bursa-pastoris* has more insertions  
11 near genes than what would be expected by additivity from a *C. orientalis*  $\times$  *C.*  
12 *grandiflora* cross. Using the approach outlined above, we calculated the expected TE  
13 copy number within 1000 bp of the closest gene from such a hybrid and compared it to  
14 the observed abundance in *C. bursa-pastoris*. We find that *C. bursa-pastoris* harbours  
15 significantly more insertions near genes, compared to what would be expected under  
16 strict additivity (Figure 4; Wilcoxon rank sum test,  $p = 0.000126$ ).

17 We used the presence/absence of all TE insertions, across all individuals in the  
18 three species to categorize insertions as either singletons (present in only one individual)  
19 or non-singletons (present in more than one individual). We find that *C. grandiflora* has  
20 the highest proportion of singletons, potentially suggesting a higher TE activity and/or  
21 stronger purifying selection against insertions than *C. orientalis* and *C. bursa-pastoris*,  
22 which both show similar proportions of singletons (Table 1). However, differences in  
23 demographic history between the species are likely also contributing to the frequency

1 spectrum, and the overall count of rare insertions is highest in *C. bursa-pastoris*. Overall,  
2 the combination of elevated copy number and a lower proportion of singletons in the  
3 tetraploid species is consistent with relaxed purifying selection following the transition to  
4 tetraploidy.

5  
6 To investigate in more detail the relative importance of inherited TE insertions  
7 from parental species vs. new ongoing transposition events, we calculated the percentage  
8 of *C. bursa-pastoris* insertions found in each diploid progenitor species, separated by  
9 insertion frequency class (Figure 5). Note that for insertions found in counts greater than  
10 7 (our sample size), this would imply that the insertion is found in both homeologous  
11 genomes at that position. As expected, low-frequency insertions are rarely found in the  
12 progenitor diploid species, suggesting a significant number of new insertions in the  
13 tetraploid, although clearly some of these cases may have been unsampled in the  
14 population but present in an ancestral diploid genome. In contrast, common insertions  
15 and those found on both homeologues tend much more often to be found in one or both  
16 diploid parental species, reflecting the ‘parental legacy’ (Buggs et al. 2014) of some  
17 insertions inherited in the tetraploid. Also as expected, more insertions are generally  
18 shared with *C. grandiflora*, reflecting their greater abundance, however a number of  
19 intermediate frequency insertions likely reflect fixed insertions found on the *C. orientalis*  
20 homeologue (Figure 5, insertion frequencies of ‘7’ reflect fixed insertions on one  
21 homeologue). Even intermediate-frequency insertions however have a large fraction  
22 unsampled from diploid progenitors, suggesting relaxed selection on de novo insertions is  
23 allowing TEs to spread since polyploid origins. Overall, these patterns highlight both the

1 additive, inherited contribution and the role of new de novo insertions in gene-rich  
2 regions in the TE complement of a recent tetraploid.

3

#### 4 **Discussion**

5 Overall, we found no evidence that *C. bursa-pastoris* is experiencing a large-scale  
6 genome wide proliferation of TEs, as would be expected if there were a genome-wide  
7 breakdown of host silencing mechanisms. This is consistent with genome size estimates  
8 of the species and its progenitors, which does not indicate a non-additive increase in  
9 genome size (Hurka et al., 2012). However, we did detect a considerably higher  
10 abundance of TEs than expected when restricting our analysis to gene rich regions. These  
11 results are in line with previous work by Douglas et al. (2015) on genome-wide SNP  
12 patterns, which suggested that while this allopolyploid has not experienced a large-scale  
13 ‘genome shock’ since its origin, it is undergoing a global quantitative reduction in the  
14 efficacy of selection on amino acid and conserved noncoding mutations. Taken together,  
15 our results suggest that long-term relaxation of selective constraints is leading to TE  
16 accumulation in gene-rich regions, without a major shift in transposition rate.

17 One important consideration when predicting the effects of polyploidization on  
18 genome evolution may be its association with mating system. Under a number of  
19 population genetic models highly outcrossing species are predicted to experience higher  
20 rates of transposable element activity and copy number (Wright and Schoen, 1999;  
21 Morgan, 2001; Charlesworth and Wright, 2001). Allopolyploidization events that are  
22 associated with a retention of high rates of outcrossing could therefore represent a  
23 ‘perfect storm’, whereby TE activity remains high while genome redundancy enables

1 rapid proliferation. On the other hand, polyploidy is often associated with elevated rates  
2 of self-fertilization compared with diploid relatives, and both asexual reproduction and  
3 high rates of selfing are common in polyploid lineages (reviewed in e.g. Mable, 2004;  
4 Husband et al., 2008; Robertson et al., 2011; Ramsey and Ramsey, 2014). Highly selfing  
5 lineages such as *C. bursa-pastoris* may thus experience a more modest increase in copy  
6 number than outcrossers; it would be of interest to investigate similarly-aged outcrossing  
7 allopolyploid lineages to assess whether TE accumulation is more dramatic in these  
8 species. On the other hand, selfing tetraploid lineages are more likely to experience  
9 severe founder events during polyploid origins, and strong genetic drift may further  
10 contribute to relaxed selection following whole-genome duplication as we observed in *C.*  
11 *bursa-pastoris* (Douglas et al., 2015).

12         It is notable that some of the most well-documented ancient TE expansion events,  
13 including maize (Schnable et al., 2009; Baucom et al., 2009; Diez et al., 2014) and the  
14 *Brassica* genus (Zhang and Wessler, 2004), are associated with ancient  
15 allopolyploidization events involving outcrossing lineages. Whether this is simply  
16 circumstantial or causal will require in-depth comparative analyses of the joint and  
17 unique effects of polyploidy and mating system on genome size and TE proliferation.  
18 Although the current age distribution of retroelements in the maize genomes suggests that  
19 TE proliferation was more recent than whole genome duplication (Bennett and Leitch  
20 2005), this does not rule out ongoing TE accumulation due to relaxed selection over  
21 millions of years. As we gain increasingly detailed insights into the time since last whole  
22 genome duplication event in many lineages, investigating how this interacts with mating  
23 system to structure genome evolution is becoming increasingly feasible.

1

## 2 **Acknowledgements**

3 We thank two anonymous reviewers for their helpful comments on the manuscript. J.A.Å  
4 was supported by a Junior Fellowship from Massey College, S.I.W. by a Natural Sciences  
5 and Engineering Research Council (NSERC) Discovery Grant, and H.R.H by the  
6 National Natural Science Foundation of China (grant number 31370005) and a fellowship  
7 from the China Scholarship Council.

1 **References**

2 Adams, K.L., and J.F. Wendel. 2005. Polyploidy and genome evolution in plants. *Current*  
3 *Opinion in Plant Biology* 8: 135–141.

4

5 Ågren, J.A., W. Wang, D. Koenig, B. Neuffer, D. Weigel, and S.I. Wright. 2014. Mating  
6 system shifts and transposable element evolution in the plant genus *Capsella*. *BMC*  
7 *Genomics* 15: 602.

8

9 Ågren, J.A., and S.I. Wright. 2015. Selfish genetic elements and plant genome size  
10 evolution. *Trends in Plant Science* 20: 195–196.

11

12 Ågren, J.A., S. Greiner, M.T.J. Johnson, and S.I. Wright. 2015. No evidence that sex and  
13 transposable elements drive genome size variation in evening primroses. *Evolution* 69:  
14 1053–1062

15

16 Alföldi, J., and K. Lindblad-Toh. 2013. Comparative genomics as a tool to understand  
17 evolution and disease. *Genome Research* 23: 1063–1068.

18

19 Baucom, R.S., J.C. Estill, C. Chaparro, N. Upshaw, A. Jogi, J. Deragon, R.P. Westerman,  
20 et al. Exceptional diversity, non-random distribution, and rapid evolution of retroelements  
21 in the B73 Maize genome. *PLoS Genetics* 5: e1000732.

22

23

- 1 Bennett, M.D, and I.J. Leitch. 2005. Genome size evolution in plants. In T.R Gregory  
2 (ed) *The Evolution of the Genome*. Elsevier, San Diego, California, USA.  
3
- 4 Buggs, R.J., Wendel, J.F., Doyle, J.J., Soltis, D.E., Soltis, P.S., and Coate, J.E. 2014. The  
5 legacy of diploid progenitors in allopolyploid gene expression patterns. *Philosophical*  
6 *Transactions of the Royal Society of London B: Biological Sciences*, 369: 20130354.  
7
- 8 Brandvain, Y., T. Slotte, K.M. Hazzouri, S.I. Wright, and G. Coop. 2013. Genomic  
9 identification of founding haplotypes reveals the history of the selfing species *Capsella*  
10 *rubella*. *PLoS Genetics* 9: e1003754.  
11
- 12 Charlesworth, D., and S.I. Wright. 2001. Breeding systems and genome evolution.  
13 *Current Opinion in Genetics and Development* 11: 685–690.  
14
- 15 Diez, C.M., E. Meca, M.I. Tenaillon, and B.S. Gaut. 2014. Three groups of transposable  
16 elements with contrasting copy number dynamics and host responses in the maize (*Zea*  
17 *mays* ssp. *mays*) genome. *PLoS Genetics* 10: e1004298.  
18
- 19 Douglas, G., G. Gos, K. Steige, A. Salcedo, K. Holm, J.A. Ågren, K. Hazzouri, et al.  
20 2015. Hybrid origins and the earliest stages of diploidization in the highly successful  
21 recent polyploid *Capsella bursa-pastoris*. *Proceedings of the National Academy of*  
22 *Sciences USA* 112: 2806–2811.  
23



- 1 Foxe, J.P., T. Slotte, E.A. Stahl, B. Neuffer, H. Hurka, and S.I Wright. 2009. Recent  
2 speciation associated with the evolution of selfing in *Capsella*. *Proceedings of the*  
3 *National Academy of Sciences USA* 106: 5241–5245.
- 4
- 5 Gregory, T.R. 2005. *The Evolution of the Genome*. Elsevier, San Diego, California, USA.
- 6
- 7 Guo, Y.L., J.S. Bechsgaard, T. Slotte, B. Neuffer, M. Lascoux, D. Weigel, and M.H.  
8 Schierup. 2009. Recent speciation of *Capsella rubella* from *Capsella grandiflora*,  
9 associated with loss of self-incompatibility and an extreme bottleneck. *Proceedings of the*  
10 *National Academy of Sciences USA* 106: 5246–5251.
- 11
- 12 Hawkins, J.S., S.R. Proulx, R.A. Rapp, and J.F. Wendel. 2009. Rapid DNA loss as a  
13 counterbalance to genome expansion through retrotransposon proliferation in plants.  
14 *Proceedings of the National Academy of Science USA* 106: 17811–17816.
- 15
- 16 Hollister, J.D. 2015. Polyploidy: adaptation to the genomic environment. *New Phytologist*  
17 205: 1034–1039.
- 18
- 19 Hurka, H., N. Friesen, D.A: German, A. Franzke, and B. Neuffer. 2012. 'Missing link'  
20 species *Capsella orientalis* and *Capsella thracica* elucidate evolution of model plant  
21 genus *Capsella* (Brassicaceae). *Molecular Ecology* 21: 1223–1238.
- 22

- 1 Husband, B.C., Ozimec, B., Martin, S.L., and L. Pollock. 2008. Mating consequences of  
2 polyploid evolution in flowering plants: current trends and insights from synthetic  
3 polyploids. *International Journal of Plant Sciences* 169: 195-206.  
4
- 5 Koenig, K., and D. Weigel. 2015. Beyond the thale: comparative genomics and genetics  
6 of *Arabidopsis* relatives. *Nature Reviews Genetics* 16: 285–298.  
7
- 8 Kofler, R., A.J. Betancourt, and C. Schlötterer. 2012. Sequencing of pooled DNA  
9 samples (Pool-Seq) uncovers complex dynamics of transposable element insertions in  
10 *Drosophila melanogaster*. *PLoS Genetics* 8: e1002487.  
11
- 12 Jaillon, O., J.M. Aury, B. Noel, B., A. Policriti, C. Clepet, A. Casagrande, N Choisne, et  
13 al. 2007. The grapevine genome sequence suggests ancestral hexaploidization in major  
14 angiosperm phyla. *Nature* 449: 463–467.  
15
- 16 Jiao, Y., N.J. Wickett, S. Ayyampalayam, A.S. Chanderbali, L. Landherr, P.E. Ralph,  
17 L.P. Tomsho, et al. 2011. Ancestral polyploidy in seed plants and angiosperms. *Nature*  
18 473: 97–100.  
19
- 20 Kraitshtein, Z., B. Yaakov, V. Khasdan, and K. Kashkush. 2010. Genetic and epigenetic  
21 dynamics of a retrotransposon after allopolyploidization of wheat. *Genetics* 186: 801–  
22 812.  
23

- 1 Leitch, I.J., and M.D. Bennett. 2004. Genome downsizing in polyploid plants. *Biological*  
2 *Journal of the Linnean Society* 82: 651–663.
- 3
- 4 Leitch, I.J., and A.R. Leitch. 2013. Genome size diversity and evolution in land plants. In  
5 I.J. Leitch, J. Greilhuber, J. Doležal, J.F. Wendel (Eds.). *Plant Genome Diversity*, 307–  
6 322. Springer, Vienna, Austria.
- 7
- 8 Li, Z., A.E. Baniaga, E.B. Sessa, M. Scascitelli, S.W. Graham, L.H. Rieseberg, and M.S.  
9 Barker. 2015. Early genome duplications in conifers and other seed plants. *Science*  
10 *Advances* 1: e1501084.
- 11
- 12 Lynch, M. 2007. *The Origins of Genome Architecture*. Massachusetts, USA.
- 13
- 14 Lysak, M.A., M.A. Koch, J.M. Beaulieu, A. Meister, and I.J. Leitch. 2009. The dynamic  
15 ups and downs of genome size evolution in Brassicaceae. *Molecular Biology and*  
16 *Evolution* 26: 85-98.
- 17
- 18 Mable, B.K. 2004. Polyploidy and self-compatibility: is there an association? 162: 803–  
19 811.
- 20
- 21 Madlung, A., R.W. Masuelli, B. Watson, S.H. Reynolds, J. Davison, and L. Comai. 2002.  
22 Remodeling of DNA methylation and phenotypic and transcriptional changes in synthetic  
23 *Arabidopsis* allotetraploids. *Plant Physiology* 129: 733–746.

1

2 Madlung, A., A.P. Tyagi, B. Watson, H. Jiang, T. Kagochi, R.W. Doerge, R.

3 Martienssen, et al. 2005. Genomic changes in synthetic *Arabidopsis* polyploids. *The*

4 *Plant Journal* 41: 221–230.

5

6 Morgan, M.T. 2001. Transposable element number in mixed mating populations.

7 *Genetics Research* 77: 261–275.

8

9 Parisod C., K. Alix, J. Just, M. Petit, V. Sarilar, C. Mhiri, M. Ainouche, et al. 2010.

10 Impact of transposable elements on the organization and function of allopolyploid

11 genomes. *New Phytologist* 186: 37–45.

12

13 Parisod C., and N. Senerchia. 2013. Responses of transposable elements to polyploidy. In

14 M.A. Grandbastien and J. Casacuberta (Eds.). *Plant Transposable Elements*, 147–168.

15 Springer, Heidelberg, Germany.

16

17 Petit, M., C. Guidat, J. Daniel, E. Denis, E. Montoriol, Q.T Bui, K.Y. Lim, et al. 2010.

18 Mobilization of retrotransposons in synthetic allotetraploid tobacco. *New Phytologist*

19 186: 135–147.

20

21 Petit, M., K.Y. Lim, E. Julio, C. Poncet, F.D. de Borne, A. Kovarik, A.R. Leitch, et al.

22 2007. Differential impact of retrotransposon populations on the genome of allotetraploid

23 tobacco (*Nicotiana tabacum*). *Molecular Genetics and Genomics* 278: 1–15.

1

2 Ramsey, J., and T.S Ramsey. 2014. Ecological studies of polyploidy in the 100 years  
3 following its discovery. *Philosophical Transactions of the Royal Society of London B:*  
4 *Biological Sciences* 369: 20130352.

5

6 Renny-Byfield S., M. Chester, A. Kovařík, S.C. Le Comber, and MA Grandbastien, M.  
7 Deloger, R.A. Nichols et al. 2011. Next generation sequencing reveals genome  
8 downsizing in allotetraploid *Nicotiana tabacum*, predominantly through the elimination  
9 of paternally derived repetitive DNAs. *Molecular Biology and Evolution* 28: 2843–2854.

10

11 Renny-Byfield, A., Kovarik, L.J. Kelly, J. Macas, P. Novak, M.W. Chase, R.A. Nichols  
12 et al. 2013. Diploidization and genome size change in allopolyploids is associated with  
13 differential dynamics of low- and high-copy sequences. *The Plant Journal* 74: 829–839.

14

15 Robertson, K. A., E.E. Goldberg, and B. Iqbal. 2011. Comparative evidence for the  
16 correlated evolution of polyploidy and self-compatibility in Solanaceae. *Evolution* 65:  
17 139–155.

18

19 Schnable, P.S., D. Ware, R.S. Fulton, J.C. Stein, F. Wei, S. Pasternak, C. Liang, et al.  
20 2009. The B73 maize genome: complexity, diversity, and dynamics. *Science* 326: 1112–  
21 1115.

22

- 1 Slotte, T., K.M. Hazzouri, J.A. Ågren, D. Koenig, F. Maumus, Y.L. Guo, K. Steige, et al.  
2 2013. The *Capsella rubella* genome and the genomic consequences of rapid mating  
3 system evolution. *Nature Genetics* 45: 831–835.  
4
- 5 Soltis, P.S., and D.E. Soltis. 2012. *Polyploidy and Genome Evolution*. Springer, New  
6 York, New York.  
7
- 8 Soltis, P.S., D. Blaine Marchant, Y. Van de Peer, and D.S. Soltis. 2015. Polyploidy and  
9 genome evolution in plants. *Current Opinion in Genetics and Development* 35: 199–125.  
10
- 11 Tenailon, M.I., M.B. Hufford, B.S. Gaut, and J. Ross-Ibarra. 2011. Genome size and  
12 transposable element content as determined by high-throughput sequencing in maize and  
13 *Zea luxurians*. *Genome Biology and Evolution* 3: 219–229.  
14
- 15 Ungerer, M.C., S. Strakosh, and Y. Zhen. 2006. Genome expansion in three hybrid  
16 sunflower species is associated with retrotransposon proliferation. *Current Biology* 16:  
17 r872–r873.  
18
- 19 Vanneste, K., G. Baele, S. Maere, and Y. Van de Peer. 2014. Analysis of 41 plant  
20 genomes supports a wave of successful genome duplications in association with the  
21 Cretaceous–Paleogene boundary. *Genome Research* 24: 1334–1347.  
22

- 1 Vision, T.J., D.G. Brown, and S.D. Tanksley. 2000. The origins of genomic duplications  
2 in *Arabidopsis*. *Science* 290: 2114–2117.  
3
- 4 Vu, G.T.H., T. Schmutzer, F. Bull, H.X. Cao, J. Fuchs, T.D. Tran, G. Jovtchev, et al.  
5 2015. Comparative genome analysis revealed divergent genome size evolution in a  
6 carnivorous plant genus. *Plant Genome* 8: 3.  
7
- 8 Wright, S.I, and D.J. Schoen DJ. 1999. Transposon dynamics and the breeding system.  
9 *Genetica* 107: 139–148.  
10
- 11 Wright, S.I., and J.A. Ågren. 2011. Sizing up *Arabidopsis* genome evolution. *Heredity*  
12 107: 509–510.  
13
- 14 Zhang, X., and S.R. Wessler. 2004. Genome-wide comparative analysis of the  
15 transposable elements in the related species *Arabidopsis thaliana* and *Brassica oleracea*.  
16 *Proceedings of the National Academy of Sciences USA* 101: 5589–5594.  
17  
18

1 **Table 1 Number of singleton and non-singleton transposon insertions in three**

2 ***Capsella* species**

|                          | Singletons | Non-singletons |
|--------------------------|------------|----------------|
| <i>C. orientalis</i>     | 524 (20%)  | 2095 (80%)     |
| <i>C. grandiflora</i>    | 3060 (29%) | 7493 (71%)     |
| <i>C. bursa-pastoris</i> | 3768 (22%) | 13358 (78%)    |

3

4

5

6

7

8

9

10

11

12

13

14

15

16

17



1 Figure 1. Phylogenetic relationships within the *Capsella* genus. The evolution and natural  
2 history of the genus are thoroughly discussed in Hurka et al. (2012), Slotte et al. (2013),  
3 and Douglas et al. (2015).

4

5 Figure 2. Boxplots of the genome wide abundance of transposable elements (TEs) in the  
6 three *Capsella* species. The expected *C. bursa-pastoris* value was generated by  
7 performing 1,000 replicates of in silico crosses between *C. orientalis* × *C. grandiflora*,  
8 sampling with replacement.

9

10 Figure 3. Boxplots of the abundance of transposable elements (TEs) in the three *Capsella*  
11 species in the gene rich chromosome arms (centromeric regions excluded). The expected  
12 *C. bursa-pastoris* value was generated by performing 1,000 replicates of in silico crosses  
13 between *C. orientalis* × *C. grandiflora*, sampling with replacement.

14

15

16 Figure 4. Average abundance of transposable elements (TEs) in 100 bp bins near their  
17 closest gene in the three *Capsella* species. Error bars are  $\pm 1$  standard error. The  
18 expected *C. bursa-pastoris* value was generated by performing 1,000 replicates of in  
19 silico crosses between *C. orientalis* × *C. grandiflora*, sampling with replacement.

20

21 Figure 5. Proportion of *C. bursa-pastoris* transposable element (TE) insertions found in  
22 the diploid progenitors *C. orientalis*, *C. grandiflora*, or both. Proportions are separated by  
23 TE frequency class in *C. bursa-pastoris*, where the counts represent the number of copies

- 1 of the insertion in a sample size of 7 *C. bursa-pastoris* individuals. Note that counts
- 2 greater than 7 imply the insertion is found on both homeologous copies of the genome,
- 3 and counts of 7 are likely to be cases of fixation events in one of the two homeologues.

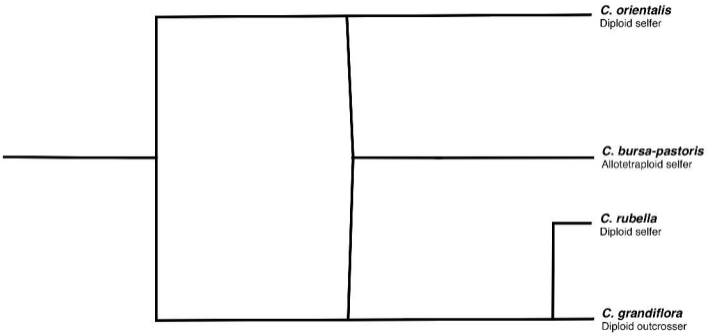

TE copy number

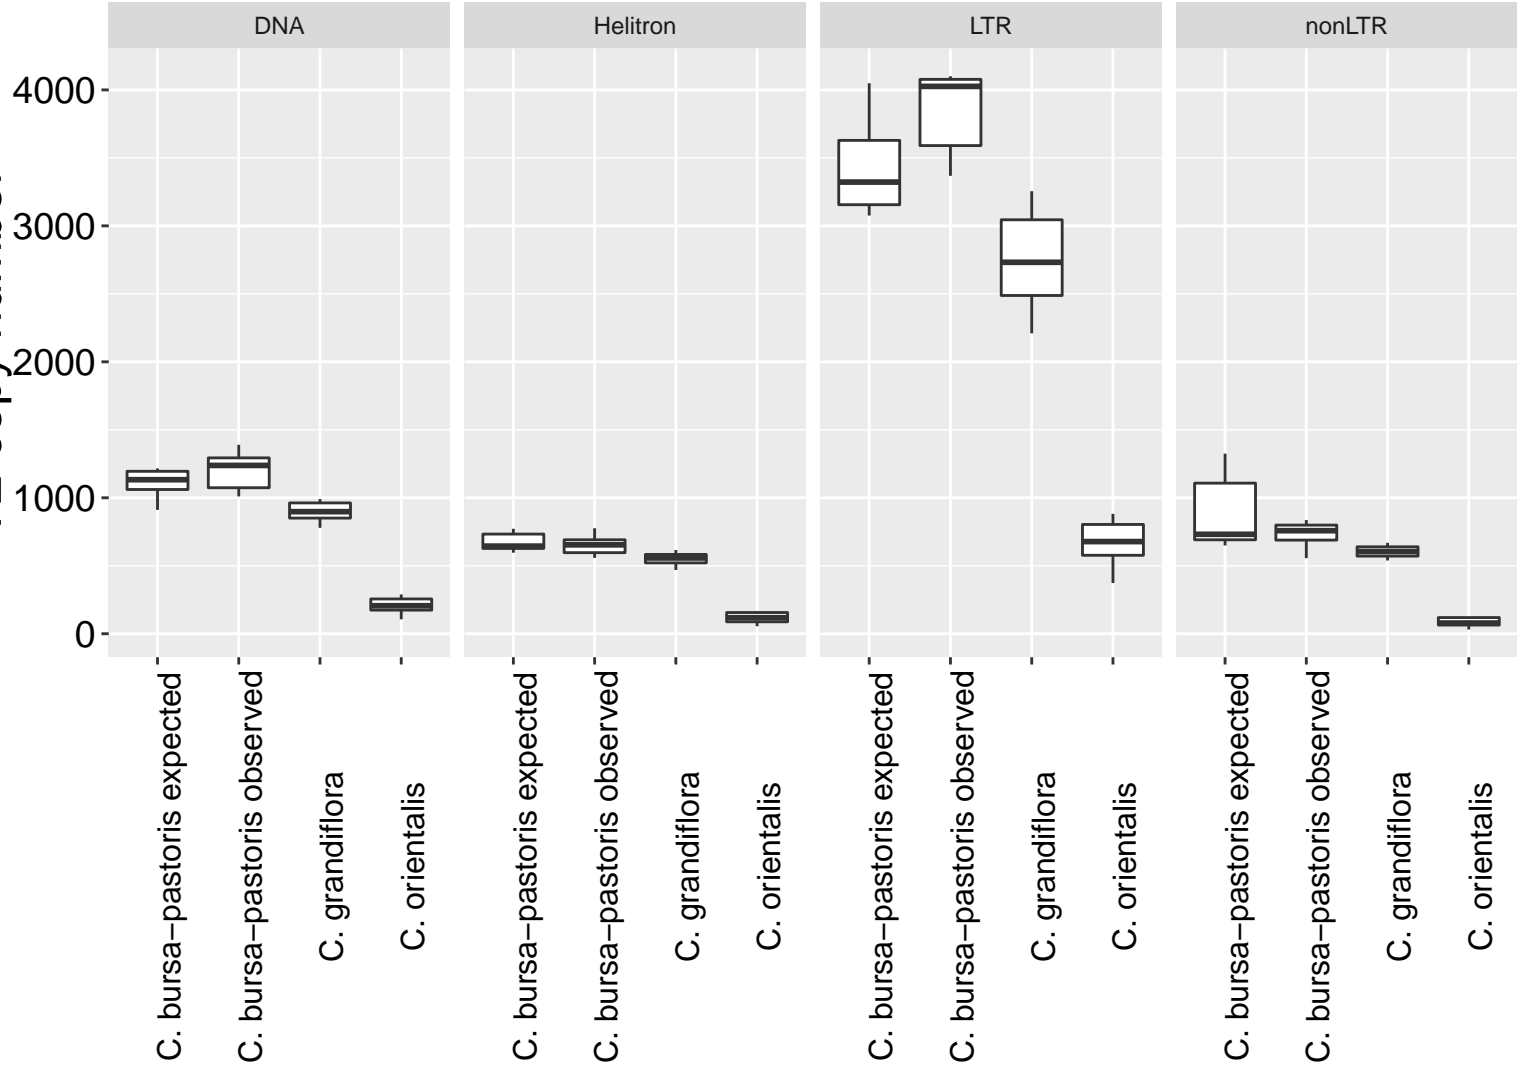

TE copy number

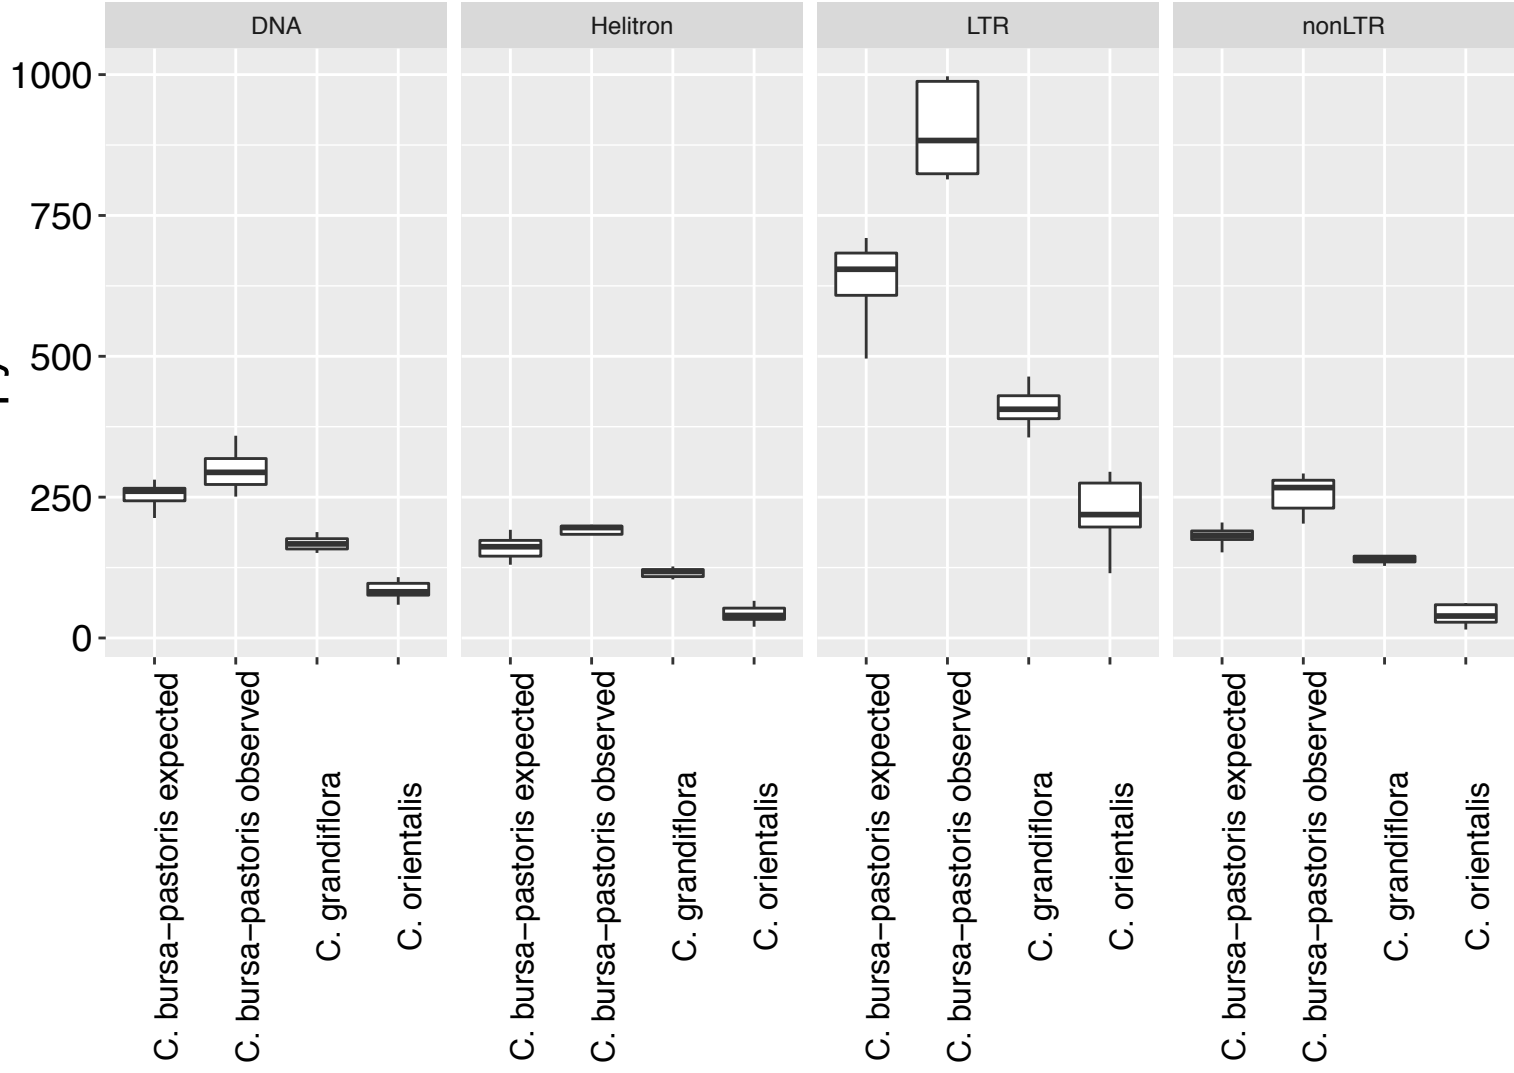

TE copy number

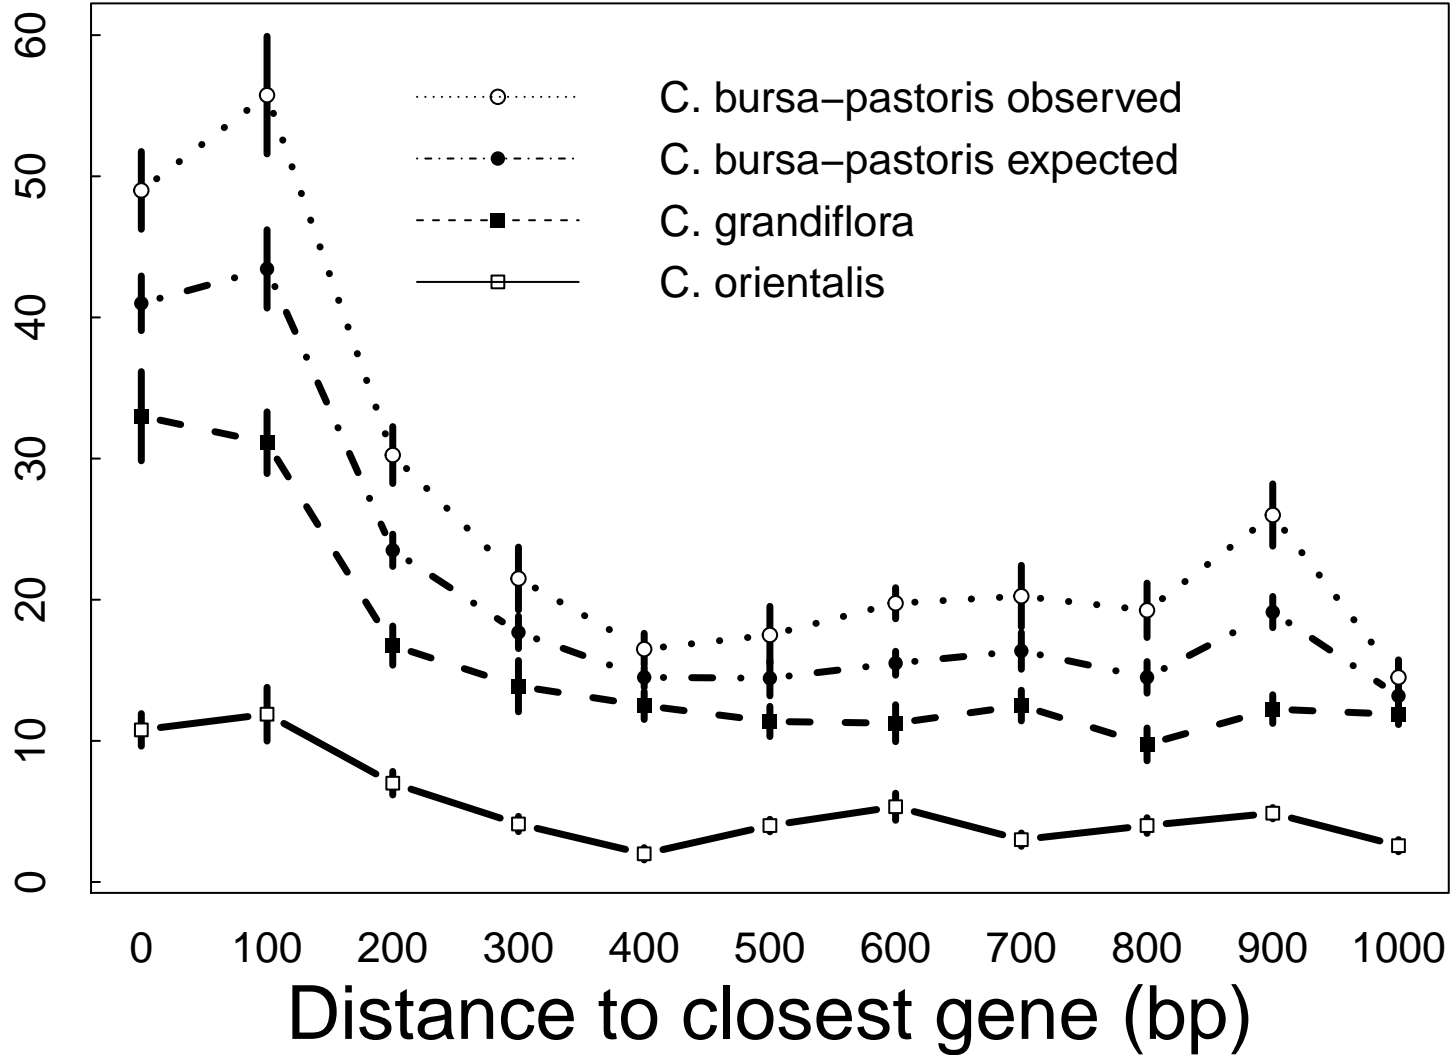

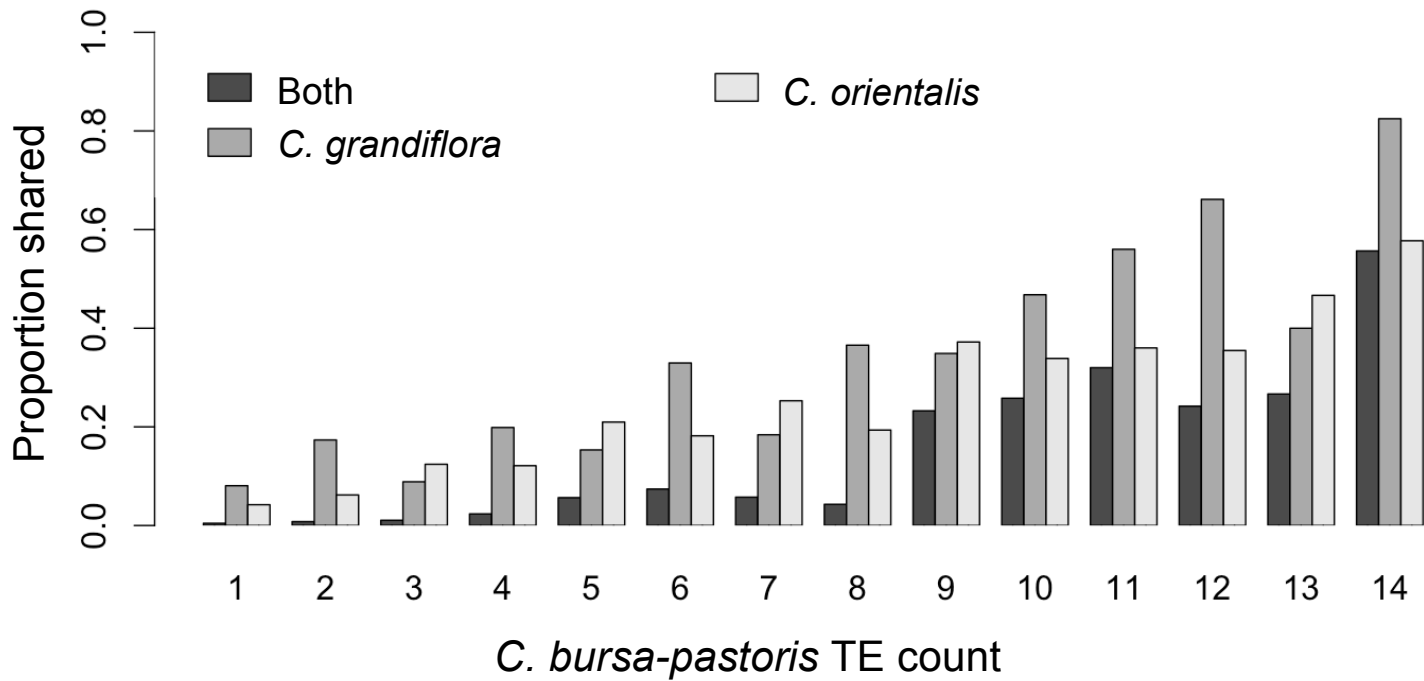

Source: http://biorxiv.org/content/10.1101/042325v2.full.pdf
